# Supplementary material
Source: PubMed Central journal article supplement (PMC3005221)

# HDAC6 and Ubp-M BUZ Domains Recognize Specific C-Terminal Sequences of Proteins<sup>†</sup>

Ryan L. Hard,<sup>‡</sup> Jiangxin Liu,<sup>§</sup> Juan Shen,<sup>‡</sup> Pei Zhou,<sup>§</sup> and Dehua Pei<sup>\*‡</sup>

## Supporting Information

**Figure S1.** Representative plots showing the binding of FITC-labeled peptides to Ubp-M and HDAC6 BUZ domains (by fluorescence anisotropy). The Ubp-M BUZ domain contained an N-terminal (His)<sub>6</sub> tag, whereas the HDAC6 BUZ domain contained an N-terminal GST fusion tag.

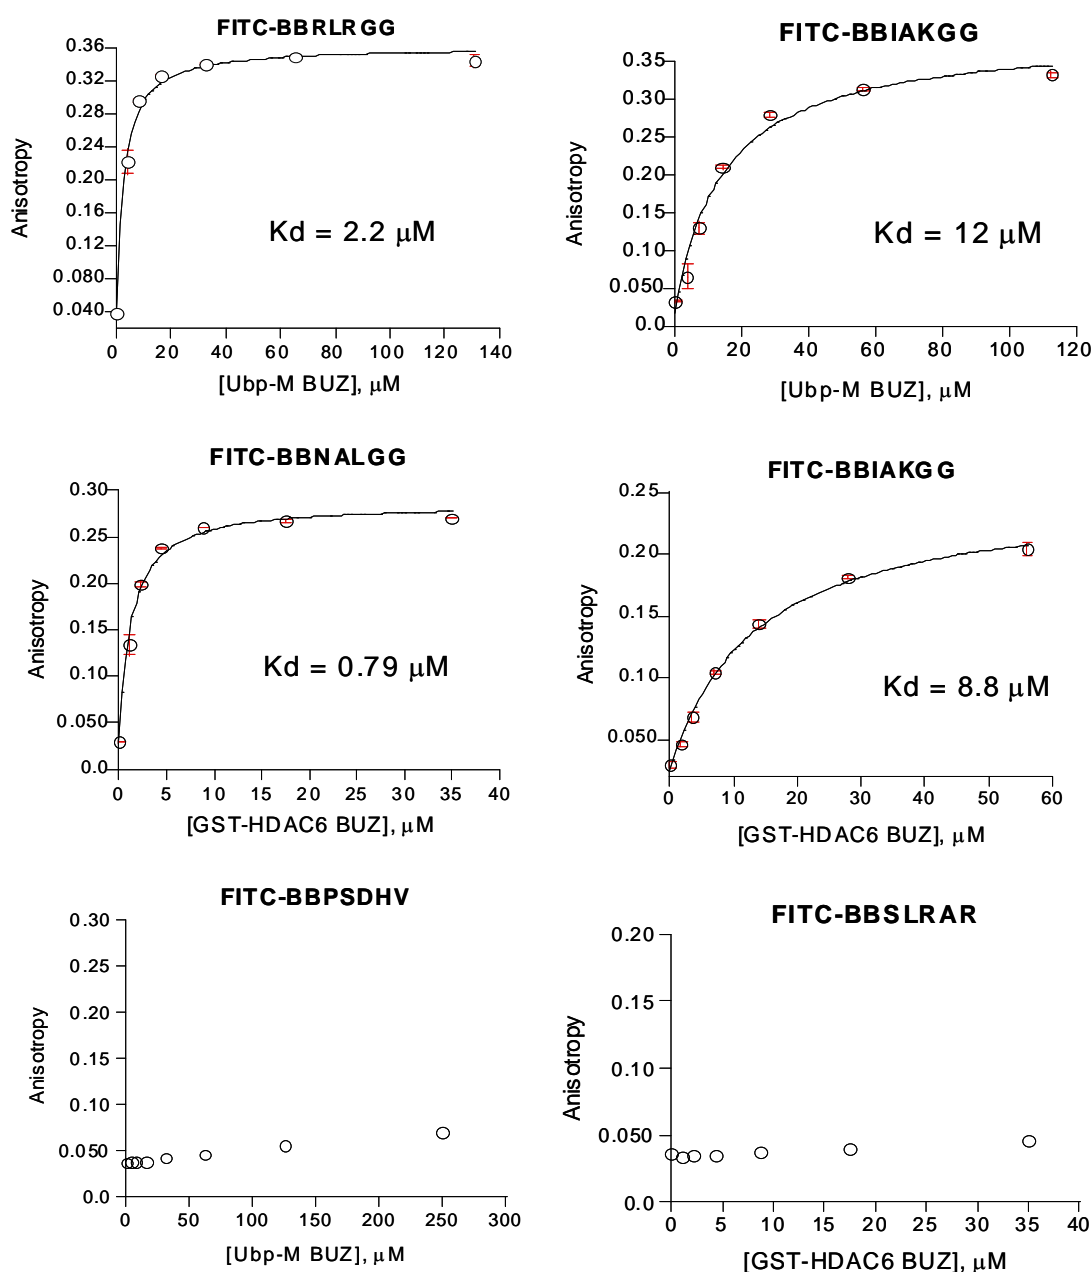

**Figure S2.** Fluorescence anisotropy assay showing the competition between FITC-labeled peptides (FITC-BBRGMGG) and full-length human ubiquitin for binding to GST-HDAC6 BUZ domain. The peptide and BUZ domain were kept at fixed concentrations (92 nM and 2.6  $\mu$ M, respectively), while the concentration of ubiquitin was varied (0–30  $\mu$ M).

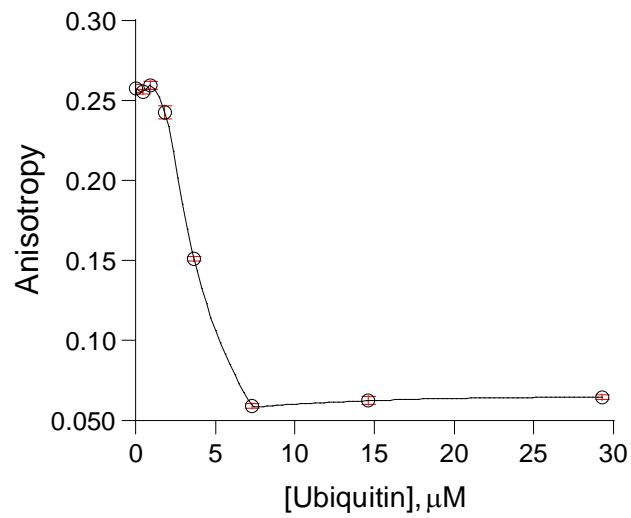

**Figure S3.** Fluorescence anisotropy assay showing the binding of peptide FITC-BBLQDGF (90 nM in all experiments) to GST. (a) Binding of the peptide to GST-HDAC6 BUZ domain; (b) plot of anisotropy against HDAC6 BUZ domain concentration (no GST tag); (c) Binding of the peptide to GST-Abl2 SH2 domain; and (d) competition between peptide FITC-BBLQDGF (90 nM) and glutathione (0–1000  $\mu$ M) for binding to GST-Abl2 SH2 domain (33  $\mu$ M). Taken together, the data indicate that peptide LQDGF does not bind to the BUZ (or SH2) domain with significant affinity, but instead binds to the active site of GST.

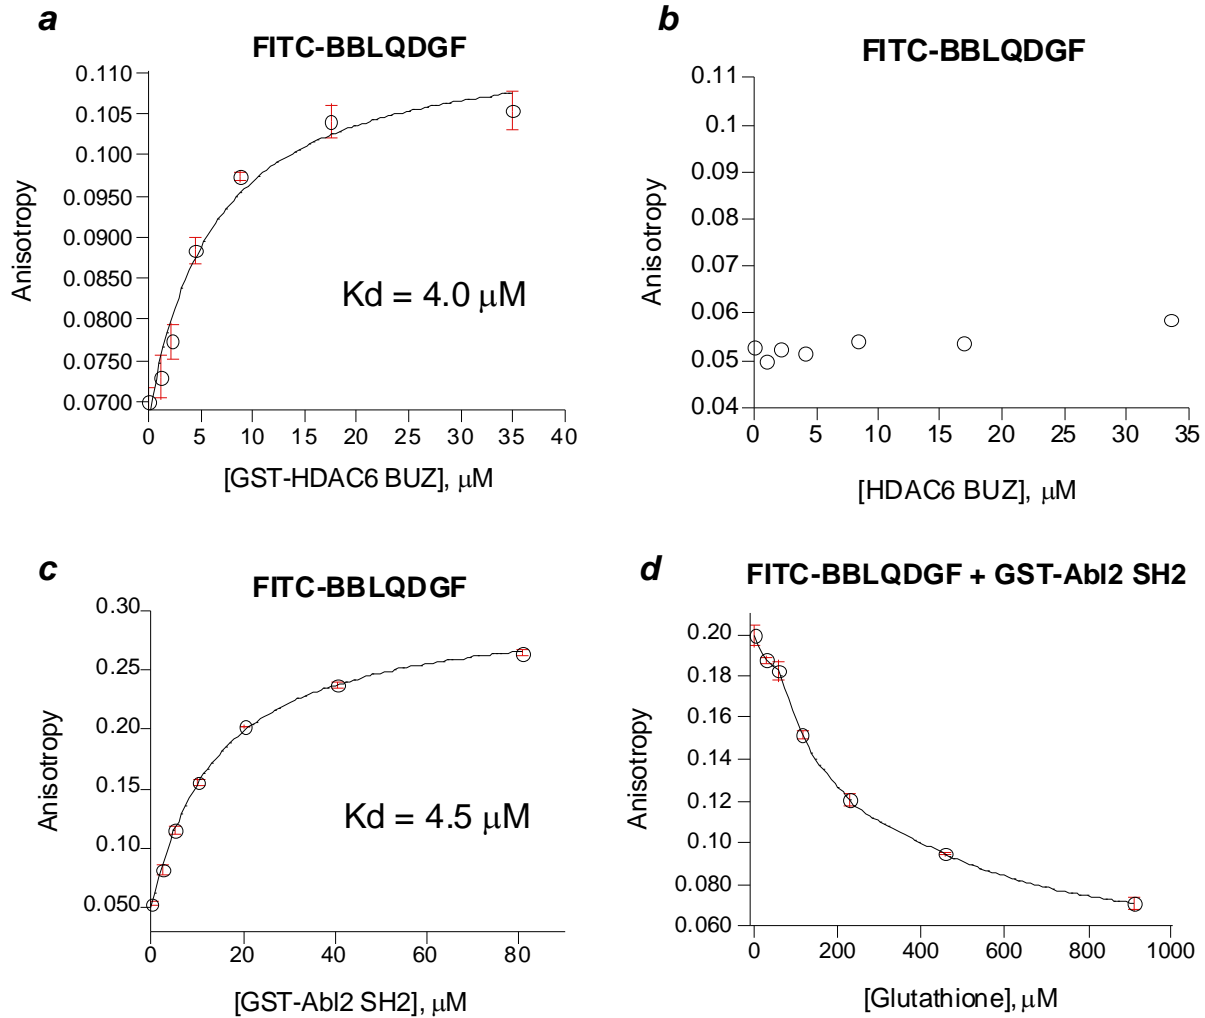

**Figure S4.** Fluorescence anisotropy assay showing the interaction between the C-terminal peptides of histone H4 (YGFGG) and FAT10 (YCIGG) and Ubp-M and HDAC6 BUZ domains.

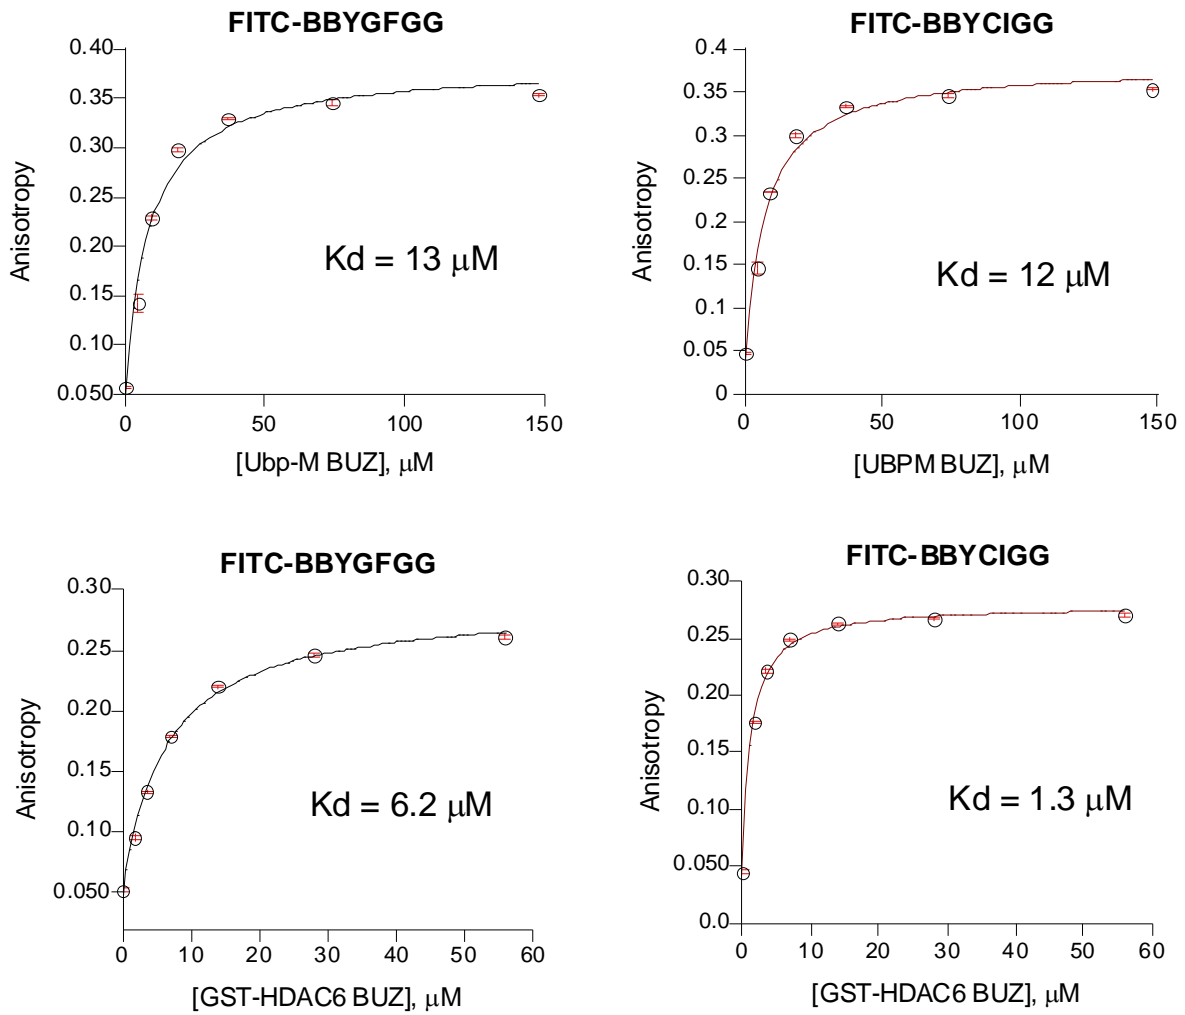

Supplement: NIHMS255330-supplement-1_si_001.pdf [file NIHMS255330-supplement-1_si_001.pdf]
